# Supplementary material for: Worldwide benefits of fair climate finance and mitigation
Source: Research Square preprint supplement (doi:10.21203/rs.3.rs-5968289/v1), 2025-03-04
Supplement: Supplementary file 1 [file e44dd16dc98c7ab55f5ecedb.pdf]

# Extended Data

## Worldwide benefits of fair climate finance and mitigation

Adriano Vinca<sup>1\*</sup>, Marina Andrijevic<sup>1</sup>, Edward Byers<sup>1</sup>, Jarmo Kikstra<sup>1,2,3</sup>, Setu Pelz<sup>1</sup>, Matt Gidden<sup>1</sup>, Volker Krey<sup>1</sup>, Keywan Riahi<sup>1</sup>

<sup>1</sup> International Institute for Applied Systems Analysis, Laxenburg, Austria

<sup>2</sup> Centre for Environmental Policy, Imperial College London, 16–18 Prince's Gardens, London SW7 1NE, United Kingdom

<sup>3</sup> The Grantham Institute for Climate Change and the Environment, Imperial College London, London, United Kingdom

\* Corresponding author

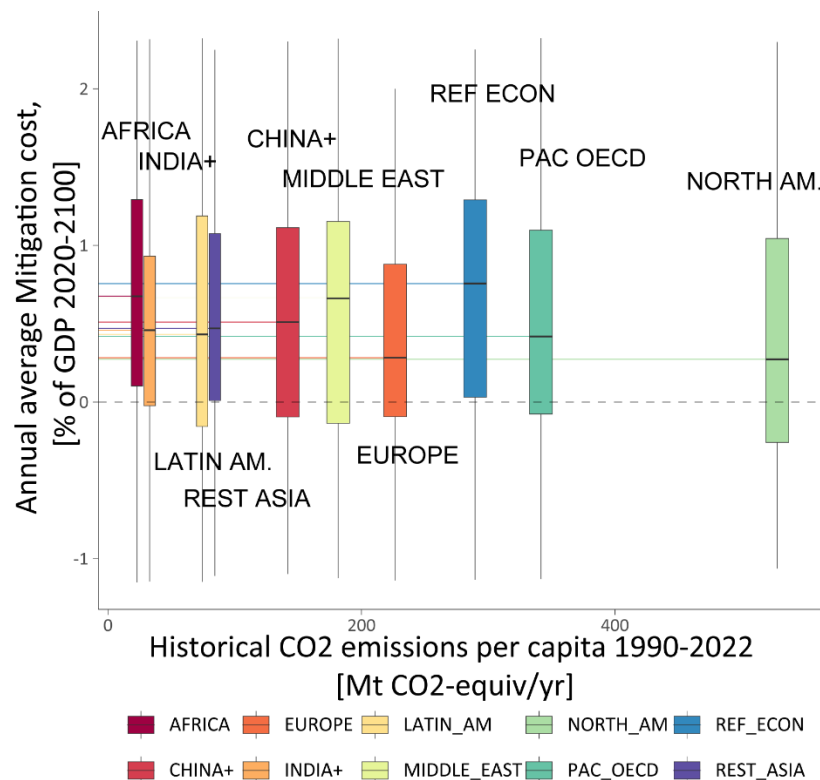

Extended Data Fig. 1. Cost-effective mitigation costs for different macroeconomic regions vs the contribution to historical emissions from the IPCC AR6 scenarios, highlighting the lack of fairness considerations.

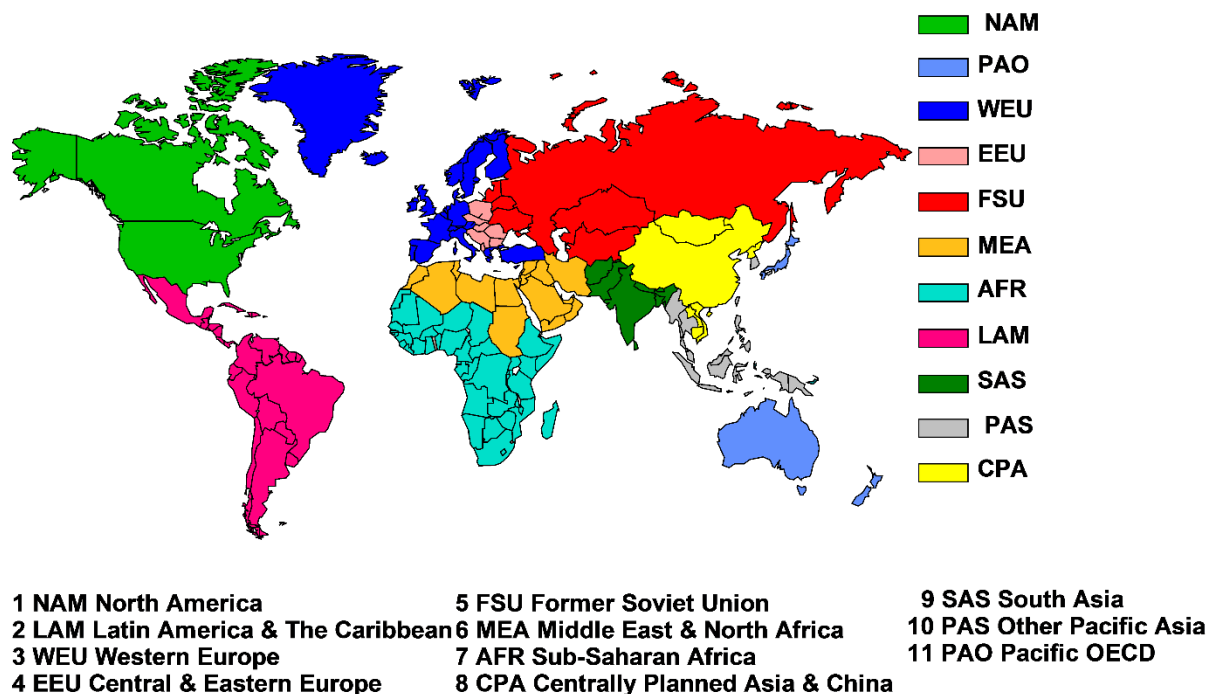

Extended Data Fig. 2. MESSAGEix-GLOBIOM regional definition. Image from the message\_doc online documentation.

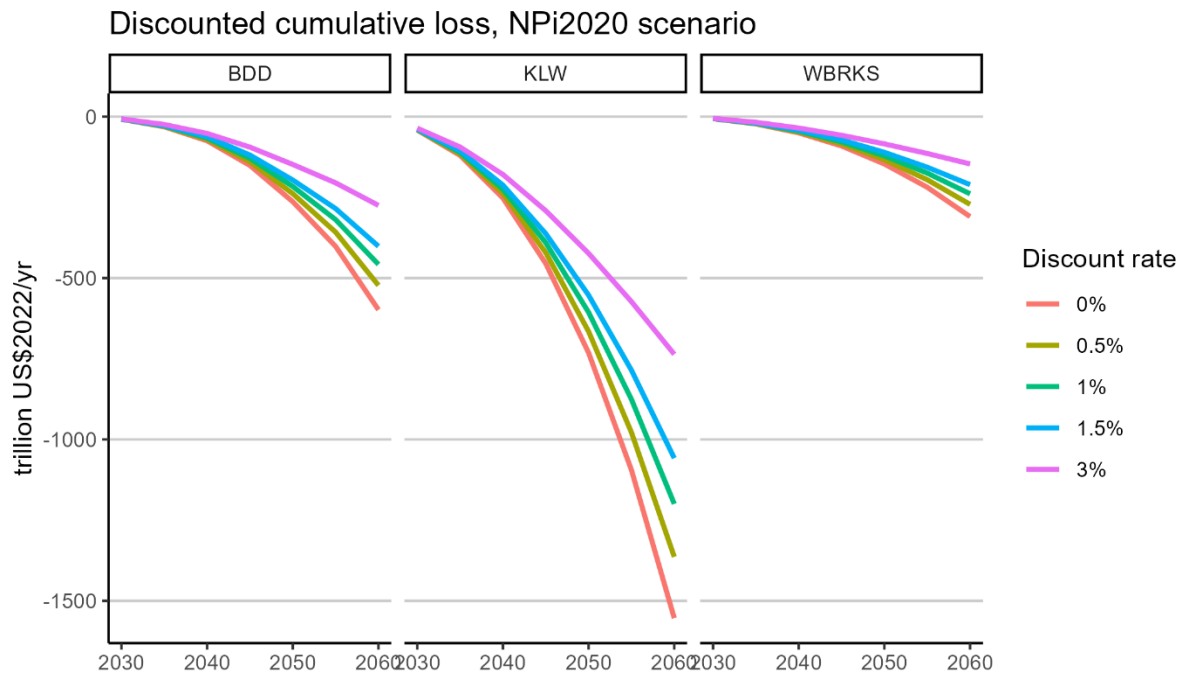

Extended Data Fig. 3. Future climate damages for three damage functions under different discount rates. The scenario Current Policies at the 50<sup>th</sup> percentile of temperature distribution is considered.

a) Mean Temperature increase

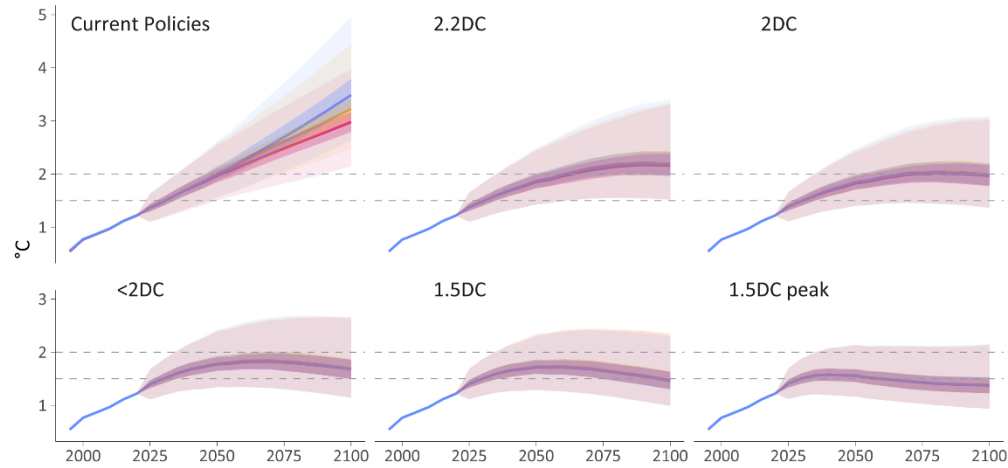

b) GDP MER

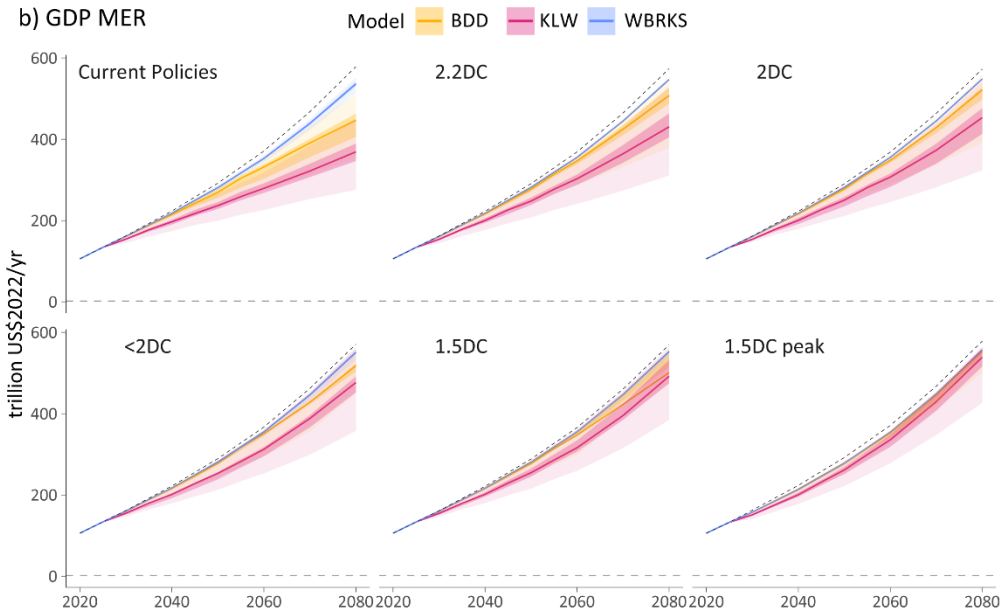

c) Final Energy

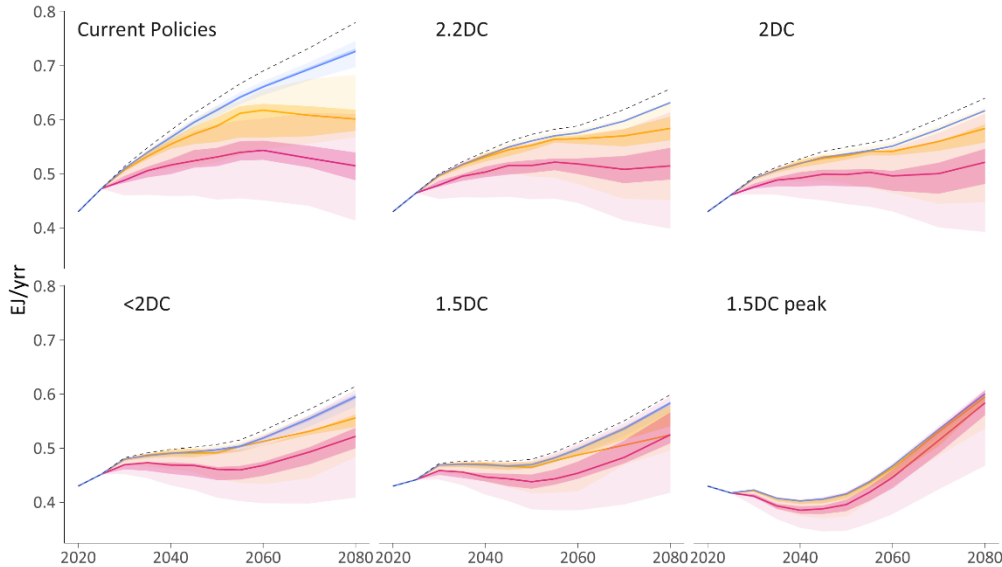

Extended Data Fig. 4. a) Global mean temperature b) Market Exchange Rate GDP c) total energy demand trends for different scenarios and damage functions (BDD, KLW and WBRKS). The line represents results for the 50<sup>th</sup> percentile of the global mean temperature distribution. The darker shaded area is the range between the 33<sup>rd</sup> and 67<sup>th</sup> percentile, the lighter area is the range between the 5<sup>th</sup> and 95<sup>th</sup> percentile.

Climate-induced GDP losses in 2050 compared to no impacts: current policy scenario

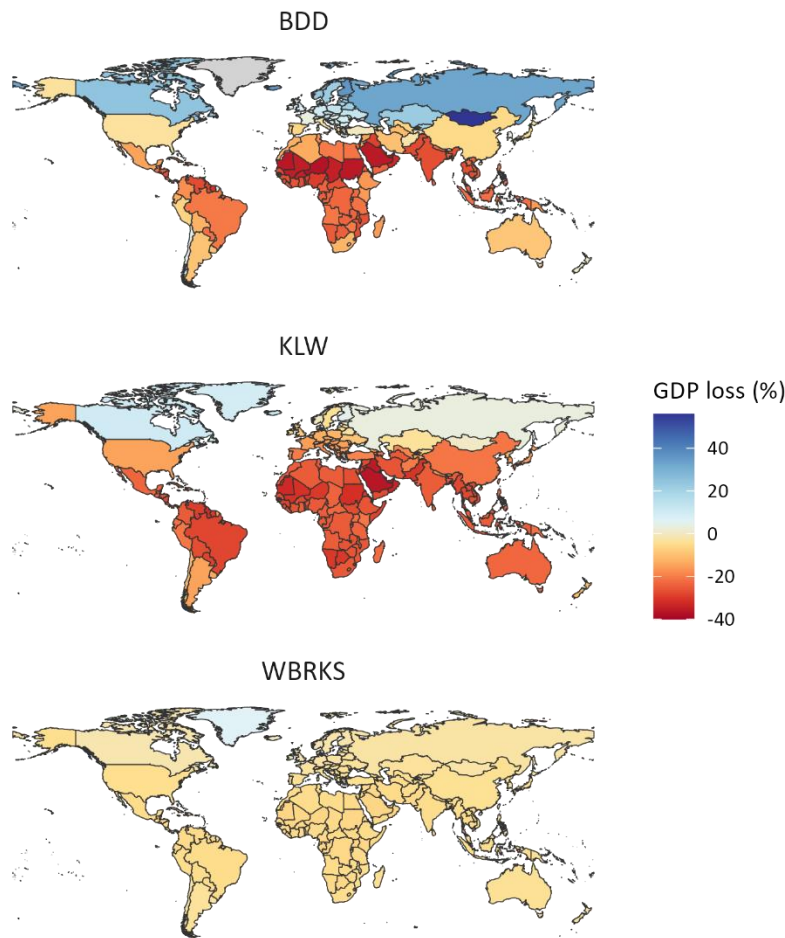

Extended Data Fig. 5. Country damages in 2050 for the Current Policies scenario across three damage functions, 50<sup>th</sup> percentile of the temperature distribution.

Scenario: < 2°C

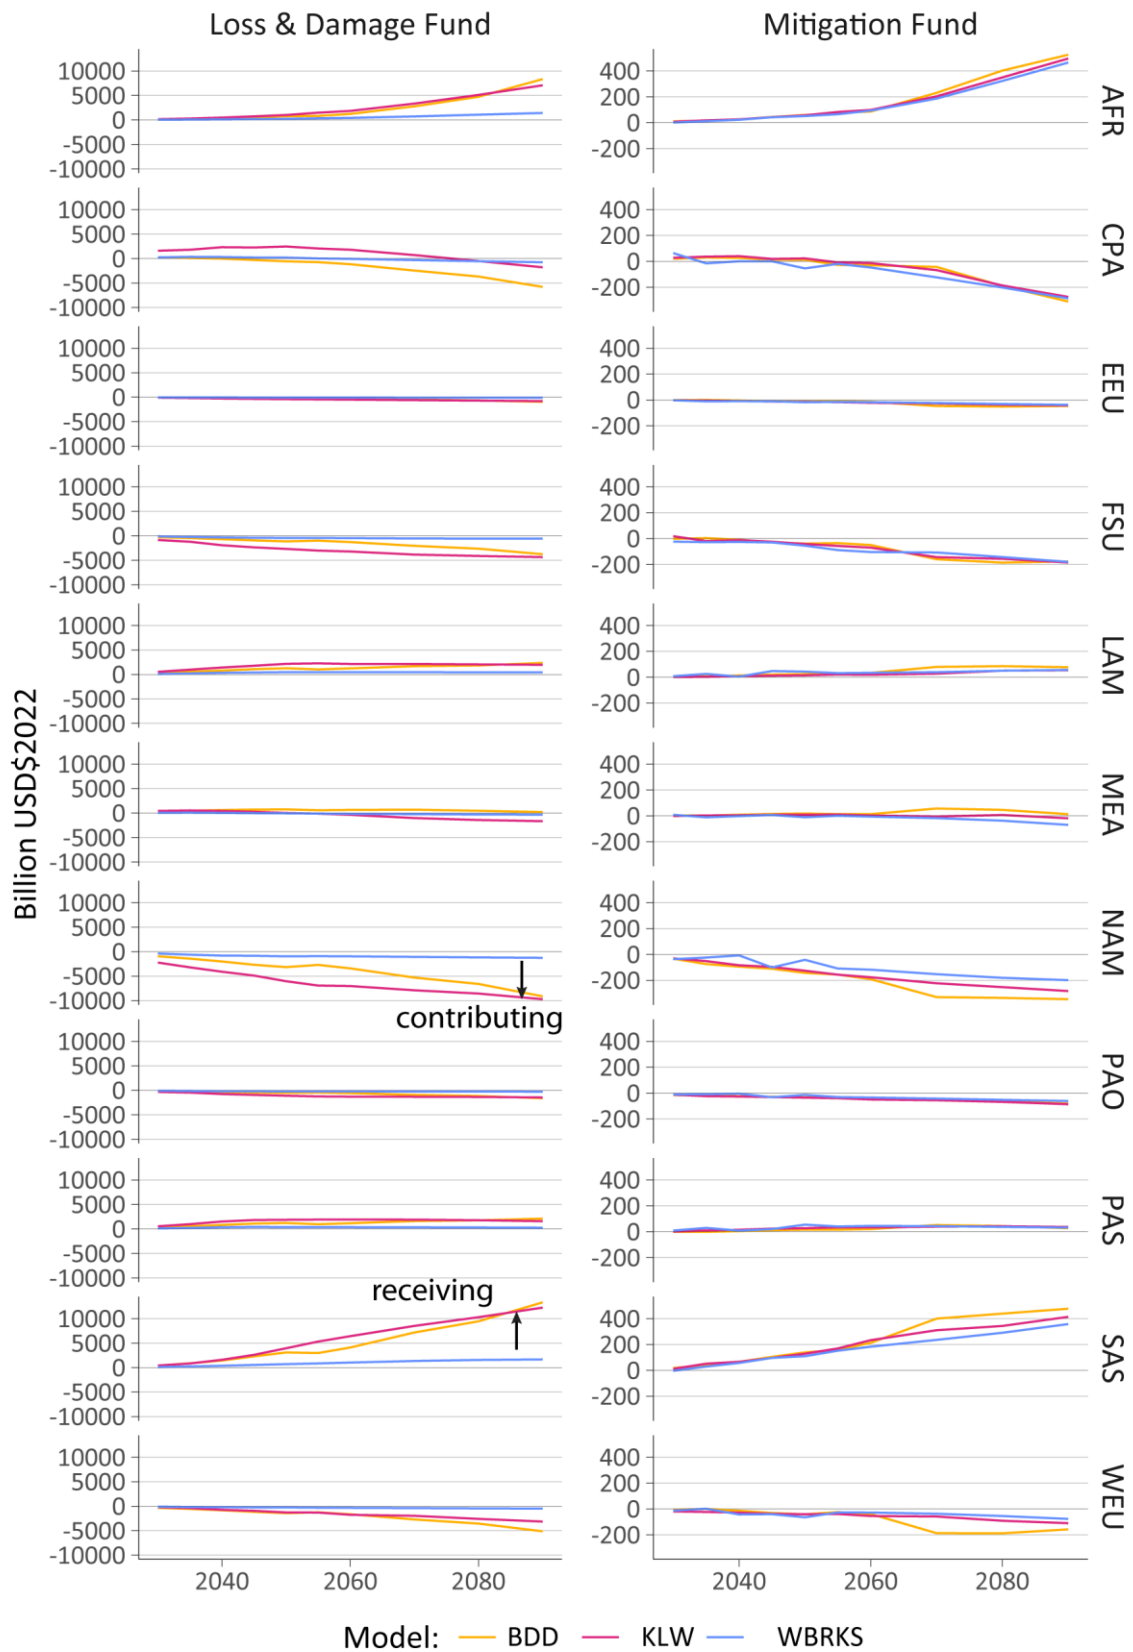

Extended Data Fig. 6. “Fair” yearly regional financial contributions to the L&D and mitigation fund in the <2DC scenario using the carbon debt fairness approach and for three damage functions.

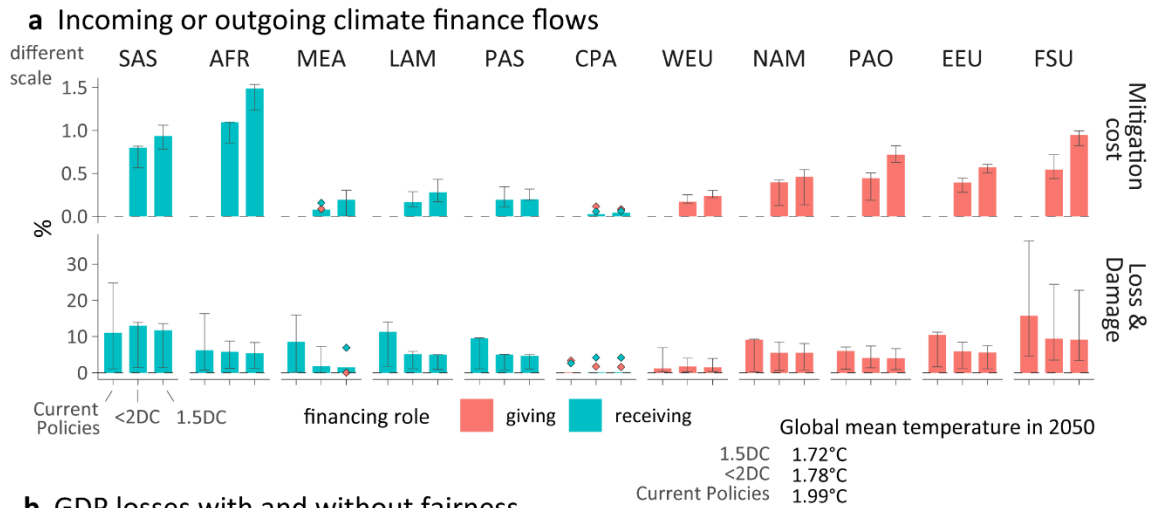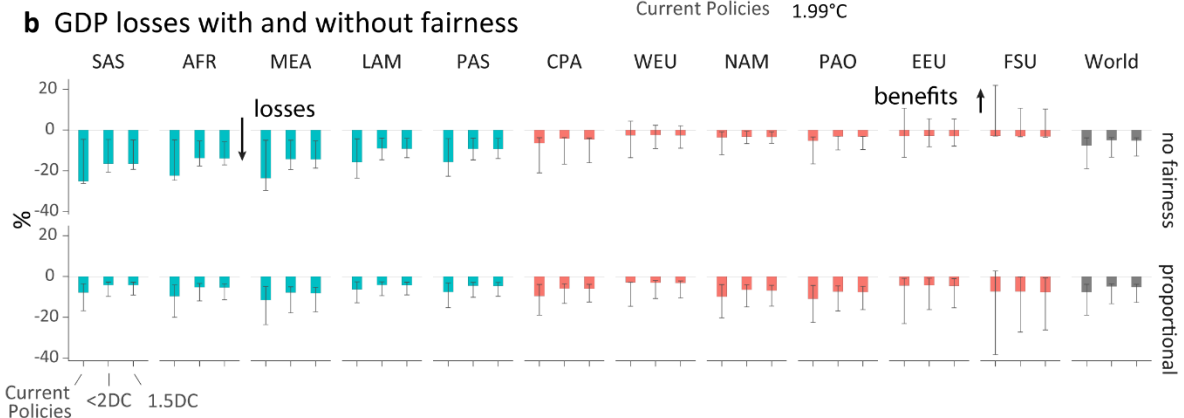

*Extended Data Fig. 7. a) Climate finance regional incoming or outgoing flows as a percentage of GDP. b) Total GDP losses compared to a hypothetical no-impact scenario net of 'fair' climate finance contributions. Both results for the Current Policies, <2DC and 1.5DC scenarios in the year 2050 at the 50th percentile of temperature distribution and considering fairness based on the approach proportional to cumulative emissions.*

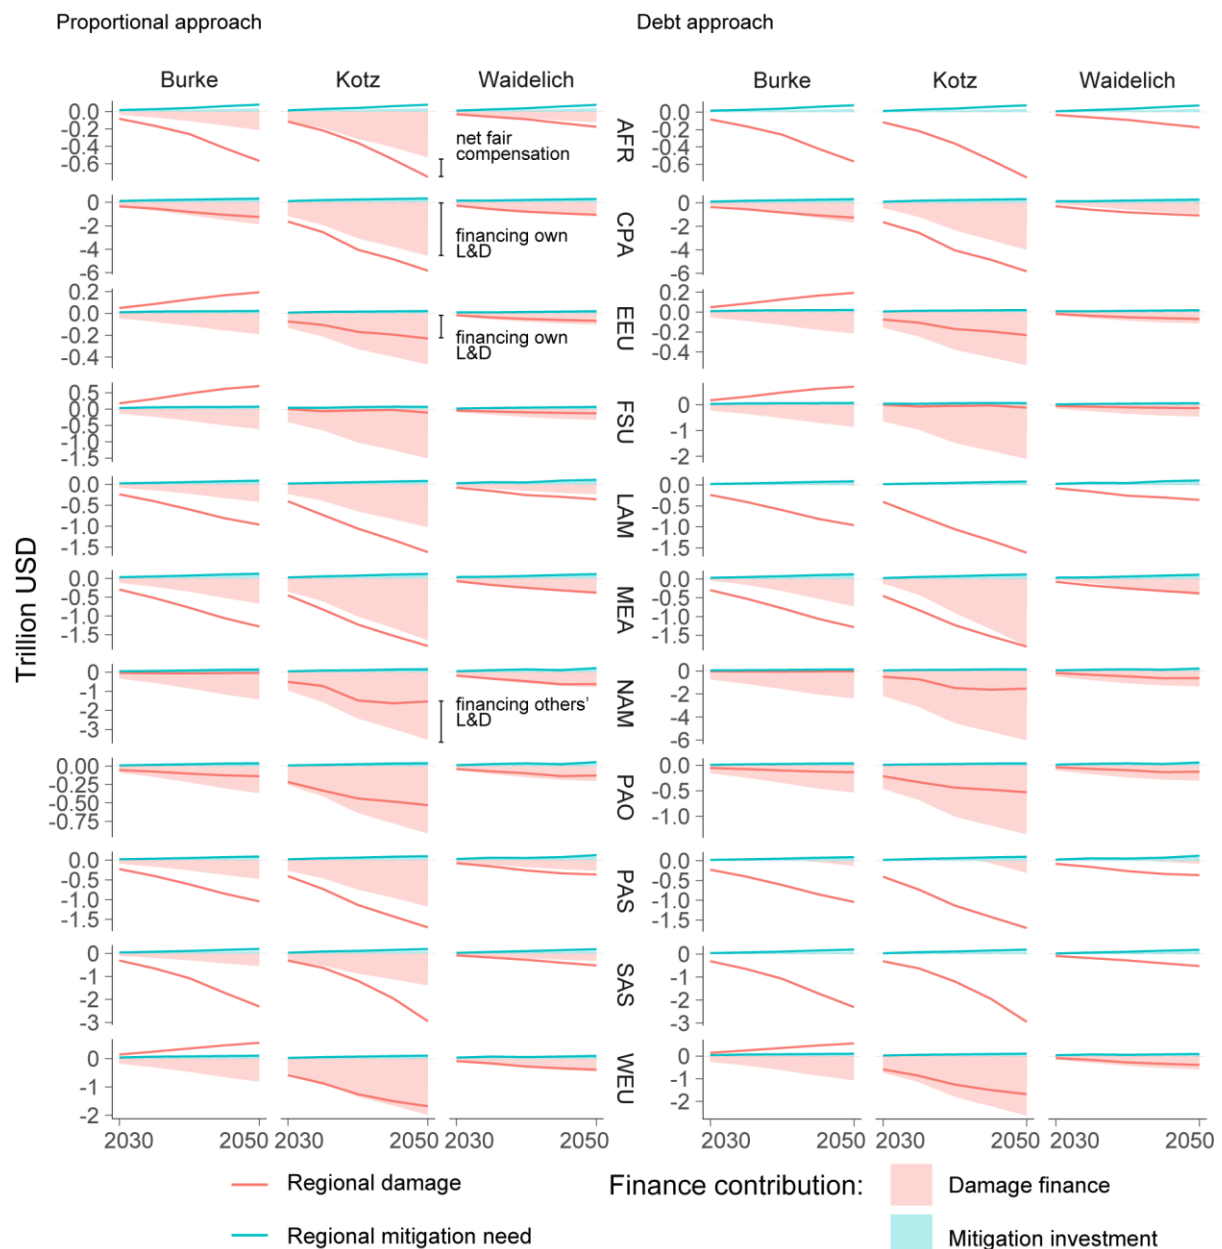

Extended Data Fig. 8. Regional total mitigation costs and damages (lines) and fair contributions (areas) for the 2DC scenario under the proportional and debt illustrative fair shares considerations. The difference between the total cost and the fair contribution determines whether a region should receive from or provide funding to other regions.



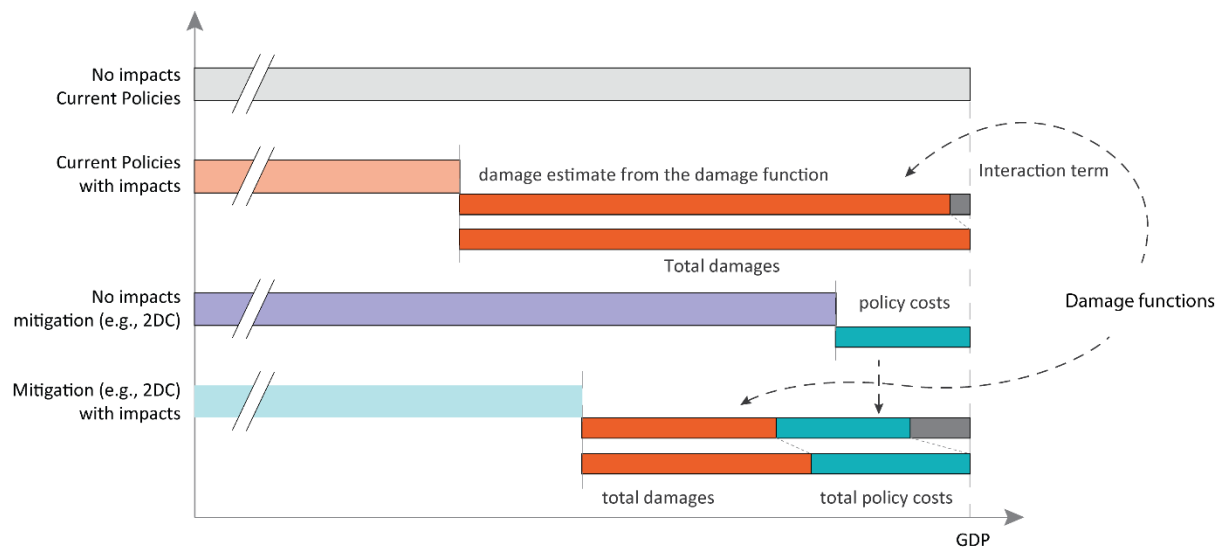

Extended Data Fig. 9. illustration of the calculation process for damages and mitigation costs. The bars represent the global or regional GDP for a specific scenario.

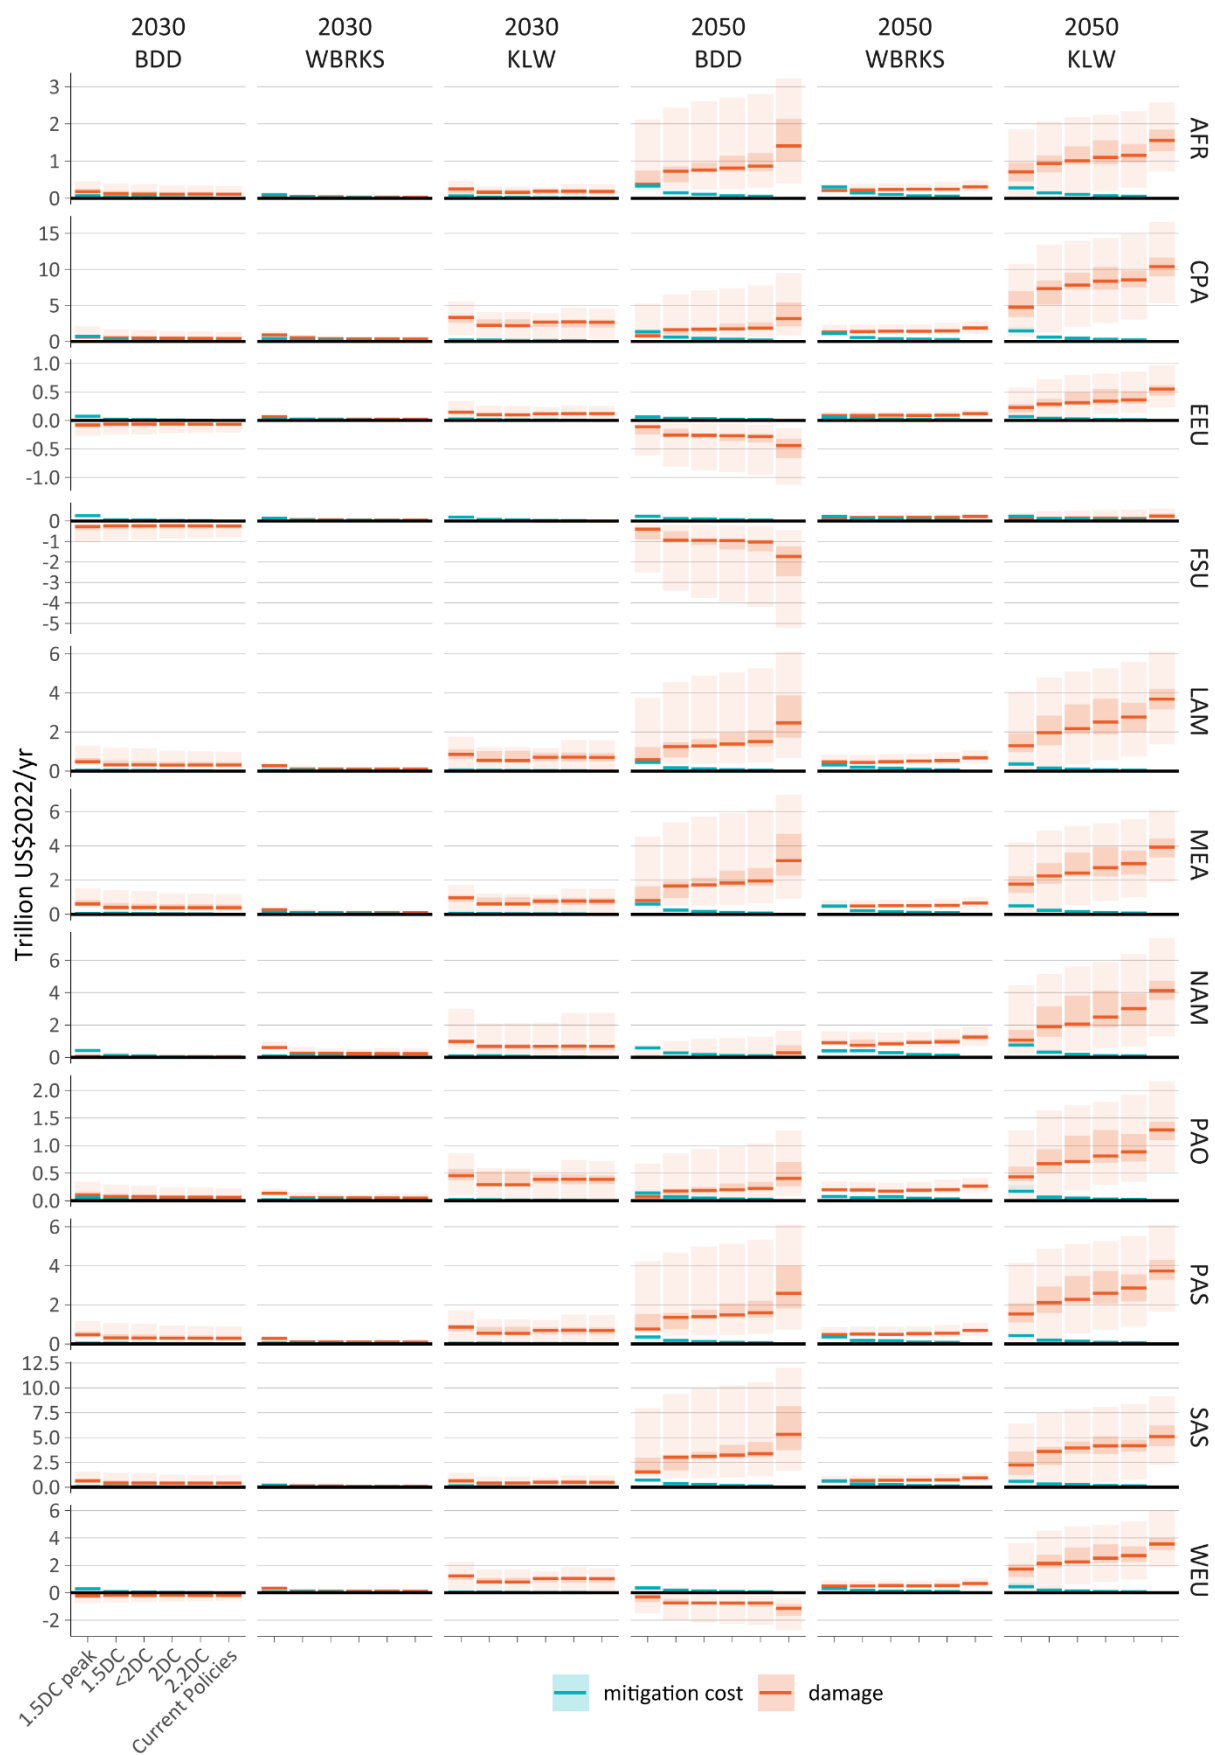

Extended Data Fig. 10. Regional discounted yearly GDP losses from mitigation costs and damage across scenarios before applying any fairness approach. Lines represent the median (50th percentile), the darker box 33rd and 67th percentiles, and the lighter area within the 5th and 95th percentiles of the temperature output distribution from MAGICC.
